# Supplementary material for: Multitracer Stable Isotope Quantification of Arginase and Nitric Oxide Synthase Activity in a Mouse Model of Pseudomonas Lung Infection
Source: Mediators Inflamm. 2014 Aug 11;2014:323526. doi: 10.1155/2014/323526 (PMC4142665; doi:10.1155/2014/323526)
Supplement: Supplementary file 1 — The supplement that will be available online is a detailed description of specific methods used. The abbreviated version of these methods is already provided in the manuscript in the Methods section in paragraph style. [file 323526.f1.doc]

**S U P P L E M E N T – Detailed methods for multi-tracer studies**

**Constant tracer infusions**

All mice received a primed (nmol) and constant infusion (nmol/h) of three stable isotopes: L-arginine.HCl [U-13C6, 97-99%] (prime: 850, constant: 1700), L-citrulline [5-13C, 99%: 4,4,5,5,-D4, 93%] (prime: 425, constant: 850) and L-ornithine.HCl [15N2, 98%] (prime: 215, constant: 430), (Cambridge Isotope Laboratories Andover, MA) given into the jugular vein of the mouse. The solution was infused at a rate of 1mL/h and isotopic steady state was achieved within 30 min (Figure 1). Blood was collected via the tail vein at baseline (before infusion) and a plateau sample was collected at 45 min which was later processed for plasma by centrifugation. The mice were then euthanized with ketamine/xylazine and necropsy was performed to isolate the lung and trachea for subsequent mass spectrometric (MS) analysis.


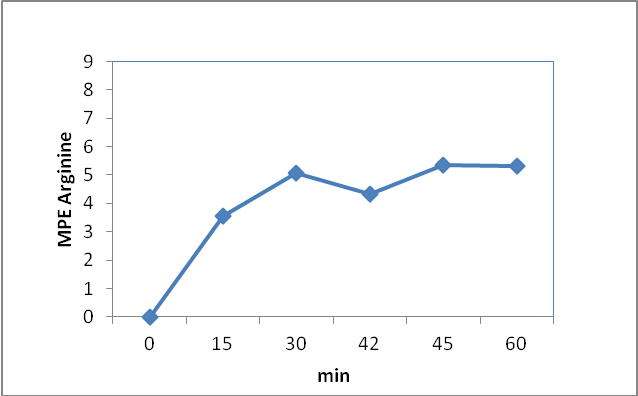


**Figure 1:** Arginine enrichment in plasma after prime-constant infusion

**Analytical procedures**

Tissues (lung and trachea) were homogenized in 2.5 mL, 0.1% formic acid (FA) and 11.25 mL methanol (MeOH) per gram tissue. After centrifugation for done for 10 min at 13,000 rpm and the supernatants were stored at -80oC.

**Preparation for tandem mass spectrometry**

*Plasma.* 50 µL plasma was deproteinated with 500 µL of methanol. After centrifugation the supernatant was dried under nitrogen (N2). The dried amino acids were reconstituted in 250 µL, 10mM ammonium acetate (NH4Ac), pH= 4.1 for MS analysis.

*Tissue methanol supernatant extract.* 250µL of the frozen tissue supernatant was also dried under N2. The dried amino acids were reconstituted in 10mM NH4Ac (pH= 4.1); 250 µL for lung tissue, and 150 µL for trachea.

**LC-MS/MS analysis**

An API 4000 triple quadrupole mass spectrometer (Applied Biosystems/MDS SCIEX) operated in positive ionization mode with the TurboIonSpray ionization probe source (operated at 5,800 V and 600oC), coupled to an Agilent 1100 HPLC system (Agilent Technologies Canada, Mississauga, ON, Canada) was used as previously described . All aspects of data acquisition were controlled using The Analyst NT v. 1.4.1 software.

As the D-isomers of the amino acids were high in plasma and even higher in the tissues, the L- and the D- forms were separated using a chiral Chirobiotic T (teicoplanin) HPLC column, 25cm x 4.6 mm, 5 um (Astec, Whippany, NJ, USA) using an isocratic gradient with 95:5 (10mM NH4Ac, pH=4.1) : (2:1 MeOH: 0.1% FA in acetonitrile (ACN) buffer at 700 µl/min, as previously reported . The injection volume was 20 µL with an overall analysis time (injection-to-injection) of 35 min. The retention times of L- and D-arginine were 24.7 and 28.8 min, respectively, for L- and D-citrulline were 5.7 and 6.5 min, respectively, and for L- and D-ornithine were 15.8 and 16.6 min, respectively. Maximum sensitivity for L- and D- arginine, citrulline and ornithine was achieved by measuring product ions multiple reaction monitoring from the fragmentation of the protonated [M + H]+ molecules of each amino acid. A representative chromatogram of a multitracer study is shown in Figure 2. Only the enrichments of the L-isoforms of the amino acids were analyzed and are presented for the study.

**Figure 2:** Representative chromatogram of a multi-tracer study

The [M + H]+ precursor (parent) ion for each of the unlabeled amino acids was (m/z 175.1 for arginine, 176.1 for citrulline and 133.1 for ornithine). The signal for the most abundant product (daughter) ions (m/z 70.1 for arginine, citrulline and ornithine were also optimized.

The labelled L-arginine.HCl [U-13C6, 97-99%] was identified using the parent/daughter ion transtion m/z 181.2/74 and was used to calculate arginine flux. The L-citrulline [5-13C, 99%: 4,4,5,5,-D4, 93%] was used to calculate the citrulline flux which was identified using parent/daughter pair of 181.1/75. The L-ornithine.HCl [15N2, 98%] was used to calculate the ornithine flux which was identified using parent/daughter pair of 135.2/71 .

To measure NOS activity, the transfer of label from arginine to citrulline was identified using parent/daughter pair of 182.1/74. To measure arginase activity, the transfer of label from arginine to ornithine was identified using parent/daughter pair of 138.2/75.

**Table 1:** Parent/daughter pairs of the amino acids used for mass spectrometry

| Isomers Used | Parent (m/z) | Daughter (m/z) |
| --- | --- | --- |
| **Arginine** |  |  |
| Unlabelled | 175.2 | 70 |
| U-13C6 | 181.2 | 74 |
| **Citrulline** |  |  |
| Unlabelled | 176.1 | 70 |
| 5-13C | 181.1 | 75 |
| From Arg- U-13C6 | 182.1 | 74 |
| **Ornithine** |  |  |
| Unlabelled | 133.2 | 70 |
| 15N2 | 135.2 | 71 |
| From Arg- U-13C6 | 138.2 | 74 |

**Calculations**

Previously published equations were used to calculate the L-arginine metabolism in blood and tissues . The isotopic enrichment was expressed as mole percent excess (MPE), calculated as enrichment at plateau minus the background measurement at baseline . The enrichment values were then used to calculate the whole body flux (Q) for each of the infused amino acids using the following formula :

Q (µmol/kg/h) = isotope infusion rate x [(enrichmentisotope/enrichmentplasma/tissue)-1]

The measurement of NOS activity was derived from the conversion of infused arginine to citrulline using the following formula:

NOS Activity = (Enrichment of Arg>Cit/Enrichment of Arg) x Qcit

The measurement of Arginase activity was determined in a similar fashion from the conversion of infused arginine to ornithine using the following formula:

Arginase Activity = (Enrichment of Arg>Orn/Enrichment of Arg) x Qorn

**References**

[1] K.L. Urschel, M. Rafii, P.B. Pencharz, R.O. Ball, A multitracer stable isotope quantification of the effects of arginine intake on whole body arginine metabolism in neonatal piglets, Am J Physiol Endocrinol Metab 293 (2007) E811-8.

[2] C. Tomlinson, M. Rafii, R.O. Ball, P. Pencharz, The significance of d-isomers in stable isotope studies in humans is dependent on the age of the subject and the amino acid tracer, Metabolism 59 (2010) 14-19.

[3] C. Tomlinson, M. Rafii, R.O. Ball, P. Pencharz, Arginine synthesis from enteral glutamine in healthy adults in the fed state, American Journal of Physiology-Endocrinology And Metabolism 301 (2011) E267-E273.

[4] D.C. Wilson, M. Rafii, R.O. Ball, P.B. Pencharz, Threonine requirement of young men determined by indicator amino acid oxidation with use of L-[1-13C] phenylalanine, The American Journal of Clinical Nutrition 71 (2000) 757-764.
